# Supplementary material for: What makes an ideal hospital-based medical leader? Three views of healthcare professionals and managers: A case study
Source: PubMed Central journal article supplement (PMC6559653; doi:10.1371/journal.pone.0218095), 2019-06-11
Supplement: pone.0218095.s001.pdf [file pone.0218095.s001.pdf]

S1 File. Data.

3-factor oplossing

Factor Matrix with an X Indicating a Defining Sort

|             |         | Loadings |         |         |
|-------------|---------|----------|---------|---------|
| QSORT       |         | 1        | 2       | 3       |
| 1           | Iarts01 | 0.0970   | 0.1441  | 0.4132X |
| 2           | Iarts02 | 0.6780X  | 0.2702  | 0.3279  |
| 3           | Iarts03 | 0.6129X  | 0.0856  | 0.1714  |
| 4           | Ivpk01  | 0.2281   | 0.2766  | 0.3491  |
| 5           | Ivpk02  | -0.0239  | 0.4217  | 0.4852X |
| 6           | Ivpk03  | 0.5320X  | 0.1806  | 0.1212  |
| 7           | Ivpk04  | 0.0698   | 0.2056  | 0.6457X |
| 8           | Ivpk05  | 0.3584   | 0.4240  | 0.5510  |
| 9           | Imana01 | 0.3777   | 0.6805X | 0.1340  |
| 10          | Imana02 | 0.1204   | 0.1407  | 0.6059X |
| 11          | Imana03 | 0.4595X  | 0.4280  | -0.0059 |
| 12          | Imana04 | 0.3849   | 0.5095X | 0.2123  |
| 13          | Imana05 | 0.7174X  | 0.1452  | 0.0522  |
| 14          | Rlab01  | 0.5339X  | 0.3450  | 0.2638  |
| 15          | Rarts01 | 0.3194   | 0.1852  | -0.1100 |
| 16          | Rarts02 | 0.2091   | 0.1689  | 0.5289X |
| 17          | Rman01  | 0.5621X  | -0.0112 | 0.2405  |
| 18          | Rarts03 | 0.7783X  | 0.0615  | 0.1065  |
| 19          | Rman02  | 0.3425X  | 0.2035  | 0.2533  |
| 20          | Rlab02  | 0.0998   | 0.4630X | 0.3370  |
| 21          | Rman03  | 0.2408   | 0.6406X | 0.0258  |
| 22          | Rlab03  | 0.0030   | 0.6275X | 0.0238  |
| 23          | Rlab04  | 0.3485   | 0.5342X | 0.3214  |
| 24          | Rman04  | 0.5809X  | -0.0446 | 0.2888  |
| 25          | Rman05  | 0.3423   | 0.1329  | 0.5413X |
| 26          | Rarts04 | 0.6400X  | 0.2136  | 0.5000  |
| 27          | Cmng01  | 0.7039X  | 0.2640  | 0.0827  |
| 28          | Cmng02  | 0.5372X  | -0.0468 | 0.3404  |
| 29          | Cmng03  | 0.6438X  | 0.2496  | 0.2839  |
| 30          | Cmng04  | 0.7492X  | 0.1817  | 0.1843  |
| 31          | Cvpk01  | 0.1313   | -0.0483 | 0.7373X |
| 32          | Cvpk02  | 0.6578X  | 0.2554  | 0.2636  |
| 33          | Cvpk03  | 0.1422   | 0.1275  | 0.5069X |
| 34          | Cvpk04  | 0.7150X  | 0.2849  | 0.1146  |
| 35          | Cvpk05  | 0.1616   | -0.1305 | 0.3401X |
| 36          | Carts01 | 0.0683   | 0.4464X | 0.1107  |
| 37          | Carts02 | 0.2516   | 0.5546X | 0.0689  |
| 38          | Carts03 | 0.0259   | 0.4834X | 0.4393  |
| 39          | Carts04 | 0.5768X  | 0.2702  | -0.4836 |
| % expl.Var. |         | 21       | 11      | 12      |

Factor Scores with Corresponding Ranks

| No. | Statement                                              | No. | Factors |    |       |    |       |    |
|-----|--------------------------------------------------------|-----|---------|----|-------|----|-------|----|
|     |                                                        |     | 1       | 2  | 3     |    |       |    |
| 1   | Goede communicatieve vaardigheden                      | 1   | 0.61    | 12 | 1.72  | 1  | 1.14  | 7  |
| 2   | In staat zijn om anderen te enthousiasmeren en te moti | 2   | 1.19    | 5  | 1.01  | 8  | 1.52  | 1  |
| 3   | In staat zijn om conflicten op te lossen               | 3   | 0.27    | 14 | 1.18  | 4  | 0.47  | 15 |
| 4   | Vaardigheden om een team te managen                    | 4   | 0.04    | 15 | 0.54  | 11 | 0.61  | 11 |
| 5   | Vaardigheden om een afdeling te managen                | 5   | -0.51   | 24 | 1.57  | 2  | -0.10 | 17 |
| 6   | In staat zijn om goed samen te werken                  | 6   | 0.61    | 11 | 1.54  | 3  | 1.23  | 4  |
| 7   | Goede onderhandelingsvaardigheden                      | 7   | -0.59   | 25 | 0.38  | 13 | -0.27 | 21 |
| 8   | Assertiviteit                                          | 8   | -0.31   | 19 | 0.33  | 14 | -1.10 | 29 |
| 9   | Een team player zijn                                   | 9   | -0.08   | 17 | 0.77  | 9  | 0.60  | 12 |
| 10  | Integriteit                                            | 10  | 1.38    | 4  | 1.05  | 6  | 1.17  | 6  |
| 11  | Oog hebben voor de kwaliteit en kosten en de balans hi | 11  | 0.76    | 10 | 0.15  | 18 | -0.23 | 20 |
| 12  | Een duidelijke visie hebben en in staat zijn deze over | 12  | 1.81    | 1  | 1.14  | 5  | 1.22  | 5  |
| 13  | Patifnt centraal stellen                               | 13  | 1.49    | 3  | 1.03  | 7  | 0.67  | 10 |
| 14  | Excellent zijn in zijn/haar medisch vakgebied          | 14  | -0.65   | 27 | -0.99 | 28 | -2.04 | 34 |
| 15  | Kennis over ziekenhuisfinanciën                        | 15  | -0.42   | 22 | -0.75 | 24 | -1.49 | 32 |
| 16  | Kennis over structuur en processen van het ziekenhuis  | 16  | 0.02    | 16 | -0.13 | 20 | 0.74  | 9  |
| 17  | Kennis over het Nederlandse zorgsysteem                | 17  | -0.59   | 26 | -1.44 | 31 | -0.11 | 18 |
| 18  | Ervaring in leiderschap                                | 18  | -1.47   | 31 | -0.15 | 21 | -1.36 | 30 |
| 19  | Getraind of opgeleid in leiderschap                    | 19  | -1.18   | 29 | 0.51  | 12 | -1.02 | 28 |
| 20  | Aanzien bij collega artsen                             | 20  | -1.56   | 32 | -1.97 | 34 | -1.67 | 33 |
| 21  | Een medisch leider ziet zichzelf voornamelijk als arts | 21  | -1.68   | 34 | -1.60 | 33 | -0.61 | 25 |
| 22  | Werkzaam als behandelend arts                          | 22  | -0.85   | 28 | -1.47 | 32 | 0.57  | 13 |
| 23  | In staat om een verbinding te maken tussen het medisch | 23  | 1.06    | 7  | 0.23  | 16 | 0.56  | 14 |
| 24  | Het belang van het gehele ziekenhuis centraal stellen  | 24  | 1.19    | 6  | 0.26  | 15 | -1.38 | 31 |
| 25  | Het belang van de vakgroep centraal stellen            | 25  | -1.24   | 30 | -0.51 | 22 | -0.91 | 27 |
| 26  | Een duidelijke functieomschrijving van medisch leiders | 26  | -1.62   | 33 | -0.85 | 26 | 1.52  | 2  |
| 27  | Acceptatie van de arts als medisch leider              | 27  | -0.50   | 23 | -1.11 | 30 | 1.23  | 3  |
| 28  | Voldoende tijd om leiderschapsrol en bijbehorende take | 28  | 0.32    | 13 | 0.18  | 17 | 0.77  | 8  |
| 29  | Betrokkenheid bij het vormgeven van de strategie van h | 29  | 1.51    | 2  | -0.79 | 25 | -0.37 | 23 |
| 30  | Verantwoordelijk voor het functioneren van medewerkers | 30  | -0.40   | 21 | -0.61 | 23 | -0.61 | 24 |
| 31  | Verbeteringen initifren                                | 31  | 0.97    | 9  | 0.66  | 10 | -0.15 | 19 |
| 32  | Netwerken en verbindingen maken buiten het ziekenhuis  | 32  | -0.35   | 20 | -0.87 | 27 | -0.77 | 26 |
| 33  | Verantwoordelijk voor de resultaten van de eenheid waa | 33  | -0.21   | 18 | 0.04  | 19 | -0.31 | 22 |
| 34  | Afdelingsoverstijgende samenwerking opzetten en/of in  | 34  | 0.98    | 8  | -1.03 | 29 | 0.46  | 16 |

Correlations Between Factor Scores

|   | 1      | 2      | 3      |
|---|--------|--------|--------|
| 1 | 1.0000 | 0.5484 | 0.4396 |
| 2 | 0.5484 | 1.0000 | 0.4299 |
| 3 | 0.4396 | 0.4299 | 1.0000 |

## Factor Scores -- For Factor 1

| No. | Statement                                                    | No. | Z-SCORES |
|-----|--------------------------------------------------------------|-----|----------|
| 12  | Een duidelijke visie hebben en in staat zijn deze over te br | 12  | 1.807    |
| 29  | Betrokkenheid bij het vormgeven van de strategie van het zie | 29  | 1.514    |
| 13  | Patiënt centraal stellen                                     | 13  | 1.493    |
| 10  | Integriteit                                                  | 10  | 1.382    |
| 2   | In staat zijn om anderen te enthousiasmeren en te motiveren  | 2   | 1.192    |
| 24  | Het belang van het gehele ziekenhuis centraal stellen        | 24  | 1.188    |
| 23  | In staat om een verbinding te maken tussen het medische -en  | 23  | 1.056    |
| 34  | Afdelingsoverstijgende samenwerking opzetten en/of in stand  | 34  | 0.984    |
| 31  | Verbeteringen initiëren                                      | 31  | 0.973    |
| 11  | Oog hebben voor de kwaliteit en kosten en de balans hierin   | 11  | 0.762    |
| 6   | In staat zijn om goed samen te werken                        | 6   | 0.612    |
| 1   | Goede communicatieve vaardigheden                            | 1   | 0.607    |
| 28  | Voldoende tijd om leiderschapsrol en bijbehorende taken uit  | 28  | 0.316    |
| 3   | In staat zijn om conflicten op te lossen                     | 3   | 0.270    |
| 4   | Vaardigheden om een team te managen                          | 4   | 0.038    |
| 16  | Kennis over structuur en processen van het ziekenhuis        | 16  | 0.025    |
| 9   | Een team player zijn                                         | 9   | -0.084   |
| 33  | Verantwoordelijk voor de resultaten van de eenheid waar leid | 33  | -0.207   |
| 8   | Assertiviteit                                                | 8   | -0.305   |
| 32  | Netwerken en verbindingen maken buiten het ziekenhuis        | 32  | -0.353   |
| 30  | Verantwoordelijk voor het functioneren van medewerkers aan w | 30  | -0.405   |
| 15  | Kennis over ziekenhuisfinanciën                              | 15  | -0.420   |
| 27  | Acceptatie van de arts als medisch leider                    | 27  | -0.504   |
| 5   | Vaardigheden om een afdeling te managen                      | 5   | -0.512   |
| 7   | Goede onderhandelingsvaardigheden                            | 7   | -0.590   |
| 17  | Kennis over het Nederlandse zorgsysteem                      | 17  | -0.592   |
| 14  | Excellent zijn in zijn/haar medisch vakgebied                | 14  | -0.645   |
| 22  | Werkzaam als behandelend arts                                | 22  | -0.852   |
| 19  | Getraind of opgeleid in leiderschap                          | 19  | -1.183   |
| 25  | Het belang van de vakgroep centraal stellen                  | 25  | -1.235   |
| 18  | Ervaring in leiderschap                                      | 18  | -1.470   |
| 20  | Aanzien bij collega artsen                                   | 20  | -1.559   |
| 26  | Een duidelijke functieomschrijving van medisch leiderschap   | 26  | -1.618   |
| 21  | Een medisch leider ziet zichzelf voornamelijk als arts       | 21  | -1.685   |

Distinguishing Statements for Factor 1 (P < .05 ; Asterisk (\*) Indicates Significance at P < .01)  
Both the Factor Q-Sort Value (Q-SV) and the Z-Score (Z-SCR) are Shown.

| No. | Statement                                                    | No. | Factors |        |      |       |      |       |
|-----|--------------------------------------------------------------|-----|---------|--------|------|-------|------|-------|
|     |                                                              |     | 1       |        | 2    |       | 3    |       |
|     |                                                              |     | Q-SV    | Z-SCR  | Q-SV | Z-SCR | Q-SV | Z-SCR |
| 12  | Een duidelijke visie hebben en in staat zijn deze over te br | 12  | 3       | 1.81*  | 2    | 1.14  | 2    | 1.22  |
| 29  | Betrokkenheid bij het vormgeven van de strategie van het zie | 29  | 3       | 1.51*  | -1   | -0.79 | -1   | -0.37 |
| 13  | Patiënt centraal stellen                                     | 13  | 3       | 1.49   | 2    | 1.03  | 1    | 0.67  |
| 24  | Het belang van het gehele ziekenhuis centraal stellen        | 24  | 2       | 1.19*  | 0    | 0.26  | -2   | -1.38 |
| 23  | In staat om een verbinding te maken tussen het medische -en  | 23  | 2       | 1.06   | 0    | 0.23  | 1    | 0.56  |
| 34  | Afdelingsoverstijgende samenwerking opzetten en/of in stand  | 34  | 1       | 0.98*  | -1   | -1.03 | 0    | 0.46  |
| 11  | Oog hebben voor de kwaliteit en kosten en de balans hierin   | 11  | 1       | 0.76*  | 0    | 0.15  | 0    | -0.23 |
| 6   | In staat zijn om goed samen te werken                        | 6   | 1       | 0.61*  | 3    | 1.54  | 2    | 1.23  |
| 1   | Goede communicatieve vaardigheden                            | 1   | 1       | 0.61*  | 3    | 1.72  | 2    | 1.14  |
| 4   | Vaardigheden om een team te managen                          | 4   | 0       | 0.04   | 1    | 0.54  | 1    | 0.61  |
| 9   | Een team player zijn                                         | 9   | 0       | -0.08* | 1    | 0.77  | 1    | 0.60  |
| 8   | Assertiviteit                                                | 8   | 0       | -0.31* | 1    | 0.33  | -1   | -1.10 |
| 32  | Netwerken en verbindingen maken buiten het ziekenhuis        | 32  | 0       | -0.35  | -1   | -0.87 | -1   | -0.77 |
| 27  | Acceptatie van de arts als medisch leider                    | 27  | -1      | -0.50* | -2   | -1.11 | 3    | 1.23  |
| 5   | Vaardigheden om een afdeling te managen                      | 5   | -1      | -0.51  | 3    | 1.57  | 0    | -0.10 |
| 17  | Kennis over het Nederlandse zorgsysteem                      | 17  | -1      | -0.59  | -2   | -1.44 | 0    | -0.11 |
| 22  | Werkzaam als behandelend arts                                | 22  | -1      | -0.85* | -2   | -1.47 | 1    | 0.57  |
| 26  | Een duidelijke functieomschrijving van medisch leiderschap   | 26  | -2      | -1.62* | -1   | -0.85 | 3    | 1.52  |

Factor Scores -- For Factor 2

| No. | Statement                                                    | No. | Z-SCORES |
|-----|--------------------------------------------------------------|-----|----------|
| 1   | Goede communicatieve vaardigheden                            | 1   | 1.721    |
| 5   | Vaardigheden om een afdeling te managen                      | 5   | 1.571    |
| 6   | In staat zijn om goed samen te werken                        | 6   | 1.544    |
| 3   | In staat zijn om conflicten op te lossen                     | 3   | 1.181    |
| 12  | Een duidelijke visie hebben en in staat zijn deze over te br | 12  | 1.135    |
| 10  | Integriteit                                                  | 10  | 1.051    |
| 13  | Patiënt centraal stellen                                     | 13  | 1.026    |
| 2   | In staat zijn om anderen te enthousiasmeren en te motiveren  | 2   | 1.009    |
| 9   | Een team player zijn                                         | 9   | 0.765    |
| 31  | Verbeteringen initiëren                                      | 31  | 0.663    |
| 4   | Vaardigheden om een team te managen                          | 4   | 0.542    |
| 19  | Getraind of opgeleid in leiderschap                          | 19  | 0.512    |
| 7   | Goede onderhandelingsvaardigheden                            | 7   | 0.376    |
| 8   | Assertiviteit                                                | 8   | 0.327    |
| 24  | Het belang van het gehele ziekenhuis centraal stellen        | 24  | 0.260    |
| 23  | In staat om een verbinding te maken tussen het medische -en  | 23  | 0.226    |
| 28  | Voldoende tijd om leiderschapsrol en bijbehorende taken uit  | 28  | 0.179    |
| 11  | Oog hebben voor de kwaliteit en kosten en de balans hierin   | 11  | 0.150    |
| 33  | Verantwoordelijk voor de resultaten van de eenheid waar leid | 33  | 0.040    |
| 16  | Kennis over structuur en processen van het ziekenhuis        | 16  | -0.131   |
| 18  | Ervaring in leiderschap                                      | 18  | -0.149   |
| 25  | Het belang van de vakgroep centraal stellen                  | 25  | -0.513   |
| 30  | Verantwoordelijk voor het functioneren van medewerkers aan w | 30  | -0.606   |
| 15  | Kennis over ziekenhuisfinanciën                              | 15  | -0.752   |
| 29  | Betrokkenheid bij het vormgeven van de strategie van het zie | 29  | -0.786   |
| 26  | Een duidelijke functieomschrijving van medisch leiderschap   | 26  | -0.852   |
| 32  | Netwerken en verbindingen maken buiten het ziekenhuis        | 32  | -0.870   |
| 14  | Excellent zijn in zijn/haar medisch vakgebied                | 14  | -0.990   |
| 34  | Afdelingsoverstijgende samenwerking opzetten en/of in stand  | 34  | -1.033   |
| 27  | Acceptatie van de arts als medisch leider                    | 27  | -1.105   |
| 17  | Kennis over het Nederlandse zorgsysteem                      | 17  | -1.444   |
| 22  | Werkzaam als behandelend arts                                | 22  | -1.475   |
| 21  | Een medisch leider ziet zichzelf voornamelijk als arts       | 21  | -1.602   |
| 20  | Aanzien bij collega artsen                                   | 20  | -1.972   |

Distinguishing Statements for Factor 2 (P < .05 ; Asterisk (\*) Indicates Significance at P < .01)  
Both the Factor Q-Sort Value (Q-SV) and the Z-Score (Z-SCR) are Shown.

| No. | Statement                                                   | No. | Factors |       |      |        |      |       |
|-----|-------------------------------------------------------------|-----|---------|-------|------|--------|------|-------|
|     |                                                             |     | 1       |       | 2    |        | 3    |       |
|     |                                                             |     | Q-SV    | Z-SCR | Q-SV | Z-SCR  | Q-SV | Z-SCR |
| 1   | Goede communicatieve vaardigheden                           | 1   | 1       | 0.61  | 3    | 1.72   | 2    | 1.14  |
| 5   | Vaardigheden om een afdeling te managen                     | 5   | -1      | -0.51 | 3    | 1.57*  | 0    | -0.10 |
| 3   | In staat zijn om conflicten op te lossen                    | 3   | 1       | 0.27  | 2    | 1.18*  | 0    | 0.47  |
| 19  | Getraind of opgeleid in leiderschap                         | 19  | -1      | -1.18 | 1    | 0.51*  | -1   | -1.02 |
| 7   | Goede onderhandelingsvaardigheden                           | 7   | -1      | -0.59 | 1    | 0.38*  | 0    | -0.27 |
| 8   | Assertiviteit                                               | 8   | 0       | -0.31 | 1    | 0.33*  | -1   | -1.10 |
| 24  | Het belang van het gehele ziekenhuis centraal stellen       | 24  | 2       | 1.19  | 0    | 0.26*  | -2   | -1.38 |
| 18  | Ervaring in leiderschap                                     | 18  | -2      | -1.47 | 0    | -0.15* | -2   | -1.36 |
| 26  | Een duidelijke functieomschrijving van medisch leiderschap  | 26  | -2      | -1.62 | -1   | -0.85* | 3    | 1.52  |
| 34  | Afdelingsoverstijgende samenwerking opzetten en/of in stand | 34  | 1       | 0.98  | -1   | -1.03* | 0    | 0.46  |
| 27  | Acceptatie van de arts als medisch leider                   | 27  | -1      | -0.50 | -2   | -1.11* | 3    | 1.23  |
| 17  | Kennis over het Nederlandse zorgsysteem                     | 17  | -1      | -0.59 | -2   | -1.44* | 0    | -0.11 |
| 22  | Werkzaam als behandelend arts                               | 22  | -1      | -0.85 | -2   | -1.47* | 1    | 0.57  |

Factor Scores -- For Factor 3

| No. | Statement                                                    | No. | Z-SCORES |
|-----|--------------------------------------------------------------|-----|----------|
| 2   | In staat zijn om anderen te enthousiasmeren en te motiveren  | 2   | 1.525    |
| 26  | Een duidelijke functieomschrijving van medisch leiderschap   | 26  | 1.525    |
| 27  | Acceptatie van de arts als medisch leider                    | 27  | 1.234    |
| 6   | In staat zijn om goed samen te werken                        | 6   | 1.233    |
| 12  | Een duidelijke visie hebben en in staat zijn deze over te br | 12  | 1.224    |
| 10  | Integriteit                                                  | 10  | 1.166    |
| 1   | Goede communicatieve vaardigheden                            | 1   | 1.139    |
| 28  | Voldoende tijd om leiderschapsrol en bijbehorende taken uit  | 28  | 0.771    |
| 16  | Kennis over structuur en processen van het ziekenhuis        | 16  | 0.740    |
| 13  | Patiënt centraal stellen                                     | 13  | 0.674    |
| 4   | Vaardigheden om een team te managen                          | 4   | 0.610    |
| 9   | Een team player zijn                                         | 9   | 0.598    |
| 22  | Werkzaam als behandelend arts                                | 22  | 0.569    |
| 23  | In staat om een verbinding te maken tussen het medische -en  | 23  | 0.562    |
| 3   | In staat zijn om conflicten op te lossen                     | 3   | 0.469    |
| 34  | Afdelingsoverstijgende samenwerking opzetten en/of in stand  | 34  | 0.460    |
| 5   | Vaardigheden om een afdeling te managen                      | 5   | -0.098   |
| 17  | Kennis over het Nederlandse zorgsysteem                      | 17  | -0.110   |
| 31  | Verbeteringen initiëren                                      | 31  | -0.152   |
| 11  | Oog hebben voor de kwaliteit en kosten en de balans hierin   | 11  | -0.229   |
| 7   | Goede onderhandelingsvaardigheden                            | 7   | -0.267   |
| 33  | Verantwoordelijk voor de resultaten van de eenheid waar leid | 33  | -0.310   |
| 29  | Betrokkenheid bij het vormgeven van de strategie van het zie | 29  | -0.373   |
| 30  | Verantwoordelijk voor het functioneren van medewerkers aan w | 30  | -0.611   |
| 21  | Een medisch leider ziet zichzelf voornamelijk als arts       | 21  | -0.613   |
| 32  | Netwerken en verbindingen maken buiten het ziekenhuis        | 32  | -0.765   |
| 25  | Het belang van de vakgroep centraal stellen                  | 25  | -0.912   |
| 19  | Getraind of opgeleid in leiderschap                          | 19  | -1.015   |
| 8   | Assertiviteit                                                | 8   | -1.097   |
| 18  | Ervaring in leiderschap                                      | 18  | -1.363   |
| 24  | Het belang van het gehele ziekenhuis centraal stellen        | 24  | -1.379   |
| 15  | Kennis over ziekenhuisfinanciën                              | 15  | -1.491   |
| 20  | Aanzien bij collega artsen                                   | 20  | -1.674   |
| 14  | Excellent zijn in zijn/haar medisch vakgebied                | 14  | -2.039   |

Distinguishing Statements for Factor 3 (P < .05 ; Asterisk (\*) Indicates Significance at P < .01)  
Both the Factor Q-Sort Value (Q-SV) and the Z-Score (Z-SCR) are Shown.

Factors

| No. | Statement                                                   | No. | 1    |       | 2    |       | 3    |        |
|-----|-------------------------------------------------------------|-----|------|-------|------|-------|------|--------|
|     |                                                             |     | Q-SV | Z-SCR | Q-SV | Z-SCR | Q-SV | Z-SCR  |
| 26  | Een duidelijke functieomschrijving van medisch leiderschap  | 26  | -2   | -1.62 | -1   | -0.85 | 3    | 1.52*  |
| 27  | Acceptatie van de arts als medisch leider                   | 27  | -1   | -0.50 | -2   | -1.11 | 3    | 1.23*  |
| 1   | Goede communicatieve vaardigheden                           | 1   | 1    | 0.61  | 3    | 1.72  | 2    | 1.14   |
| 28  | Voldoende tijd om leiderschapsrol en bijbehorende taken uit | 28  | 1    | 0.32  | 0    | 0.18  | 1    | 0.77   |
| 16  | Kennis over structuur en processen van het ziekenhuis       | 16  | 0    | 0.02  | 0    | -0.13 | 1    | 0.74*  |
| 22  | Werkzaam als behandelend arts                               | 22  | -1   | -0.85 | -2   | -1.47 | 1    | 0.57*  |
| 34  | Afdelingsoverstijgende samenwerking opzetten en/of in stand | 34  | 1    | 0.98  | -1   | -1.03 | 0    | 0.46*  |
| 5   | Vaardigheden om een afdeling te managen                     | 5   | -1   | -0.51 | 3    | 1.57  | 0    | -0.10  |
| 17  | Kennis over het Nederlandse zorgsysteem                     | 17  | -1   | -0.59 | -2   | -1.44 | 0    | -0.11  |
| 31  | Verbeteringen initiëren                                     | 31  | 1    | 0.97  | 1    | 0.66  | 0    | -0.15* |
| 21  | Een medisch leider ziet zichzelf voornamelijk als arts      | 21  | -3   | -1.68 | -2   | -1.60 | -1   | -0.61* |
| 8   | Assertiviteit                                               | 8   | 0    | -0.31 | 1    | 0.33  | -1   | -1.10* |
| 24  | Het belang van het gehele ziekenhuis centraal stellen       | 24  | 2    | 1.19  | 0    | 0.26  | -2   | -1.38* |
| 15  | Kennis over ziekenhuisfinanciën                             | 15  | 0    | -0.42 | -1   | -0.75 | -2   | -1.49* |
| 14  | Excellent zijn in zijn/haar medisch vakgebied               | 14  | -1   | -0.65 | -1   | -0.99 | -3   | -2.04* |

Consensus Statements -- Those That Do Not Distinguish Between ANY Pair of Factors. All Listed Statements are Non-Significant at P>.01, and Those Flagged With an \* are also Non-Significant at P>.05.

Factors

| No. | Statement                                                    | No. | 1    |       | 2    |       | 3    |       |
|-----|--------------------------------------------------------------|-----|------|-------|------|-------|------|-------|
|     |                                                              |     | Q-SV | Z-SCR | Q-SV | Z-SCR | Q-SV | Z-SCR |
| 2   | In staat zijn om anderen te enthousiasmeren en te motiveren  | 2   | 2    | 1.19  | 1    | 1.01  | 3    | 1.52  |
| 10* | Integriteit                                                  | 10  | 2    | 1.38  | 2    | 1.05  | 2    | 1.17  |
| 20  | Aanzien bij collega artsen                                   | 20  | -2   | -1.56 | -3   | -1.97 | -2   | -1.67 |
| 28  | Voldoende tijd om leiderschapsrol en bijbehorende taken uit  | 28  | 1    | 0.32  | 0    | 0.18  | 1    | 0.77  |
| 30* | Verantwoordelijk voor het functioneren van medewerkers aan w | 30  | 0    | -0.40 | -1   | -0.61 | -1   | -0.61 |
| 32  | Netwerken en verbindingen maken buiten het ziekenhuis        | 32  | 0    | -0.35 | -1   | -0.87 | -1   | -0.77 |
| 33* | Verantwoordelijk voor de resultaten van de eenheid waar leid | 33  | 0    | -0.21 | 0    | 0.04  | 0    | -0.31 |

## Factor Q-Sort Values for Each Statement

|     |                                                              | Factor Arrays |    |    |    |
|-----|--------------------------------------------------------------|---------------|----|----|----|
| No. | Statement                                                    | No.           | 1  | 2  | 3  |
| 1   | Goede communicatieve vaardigheden                            | 1             | 1  | 3  | 2  |
| 2   | In staat zijn om anderen te enthousiasmeren en te motiveren  | 2             | 2  | 1  | 3  |
| 3   | In staat zijn om conflicten op te lossen                     | 3             | 1  | 2  | 0  |
| 4   | Vaardigheden om een team te managen                          | 4             | 0  | 1  | 1  |
| 5   | Vaardigheden om een afdeling te managen                      | 5             | -1 | 3  | 0  |
| 6   | In staat zijn om goed samen te werken                        | 6             | 1  | 3  | 2  |
| 7   | Goede onderhandelingsvaardigheden                            | 7             | -1 | 1  | 0  |
| 8   | Assertiviteit                                                | 8             | 0  | 1  | -1 |
| 9   | Een team player zijn                                         | 9             | 0  | 1  | 1  |
| 10  | Integriteit                                                  | 10            | 2  | 2  | 2  |
| 11  | Oog hebben voor de kwaliteit en kosten en de balans hierin   | 11            | 1  | 0  | 0  |
| 12  | Een duidelijke visie hebben en in staat zijn deze over te br | 12            | 3  | 2  | 2  |
| 13  | Patifnt centraal stellen                                     | 13            | 3  | 2  | 1  |
| 14  | Excellent zijn in zijn/haar medisch vakgebied                | 14            | -1 | -1 | -3 |
| 15  | Kennis over ziekenhuisfinanciën                              | 15            | 0  | -1 | -2 |
| 16  | Kennis over structuur en processen van het ziekenhuis        | 16            | 0  | 0  | 1  |
| 17  | Kennis over het Nederlandse zorgsysteem                      | 17            | -1 | -2 | 0  |
| 18  | Ervaring in leiderschap                                      | 18            | -2 | 0  | -2 |
| 19  | Getraind of opgeleid in leiderschap                          | 19            | -1 | 1  | -1 |
| 20  | Aanzien bij collega artsen                                   | 20            | -2 | -3 | -2 |
| 21  | Een medisch leider ziet zichzelf voornamelijk als arts       | 21            | -3 | -2 | -1 |
| 22  | Werkzaam als behandelend arts                                | 22            | -1 | -2 | 1  |
| 23  | In staat om een verbinding te maken tussen het medische -en  | 23            | 2  | 0  | 1  |
| 24  | Het belang van het gehele ziekenhuis centraal stellen        | 24            | 2  | 0  | -2 |
| 25  | Het belang van de vakgroep centraal stellen                  | 25            | -2 | 0  | -1 |
| 26  | Een duidelijke functieomschrijving van medisch leiderschap   | 26            | -2 | -1 | 3  |
| 27  | Acceptatie van de arts als medisch leider                    | 27            | -1 | -2 | 3  |
| 28  | Voldoende tijd om leiderschapsrol en bijbehorende taken uit  | 28            | 1  | 0  | 1  |
| 29  | Betrokkenheid bij het vormgeven van de strategie van het zie | 29            | 3  | -1 | -1 |
| 30  | Verantwoordelijk voor het functioneren van medewerkers aan w | 30            | 0  | -1 | -1 |
| 31  | Verbeteringen initiëren                                      | 31            | 1  | 1  | 0  |
| 32  | Netwerken en verbindingen maken buiten het ziekenhuis        | 32            | 0  | -1 | -1 |
| 33  | Verantwoordelijk voor de resultaten van de eenheid waar leid | 33            | 0  | 0  | 0  |
| 34  | Afdelingsoverstijgende samenwerking opzetten en/of in stand  | 34            | 1  | -1 | 0  |
